# Supplementary material for: Synthesis optimization of the ultra-microporous [Ni3(HCOO)6] framework to improve its CH4/N2separation selectivity
Source: Royal Society of Chemistry journal article supplement (doi:10.1039/c4ra05407e), 2014-01-01
Supplement: c4ra05407e1.pdf [file c4ra05407e1.pdf]

## Electronic Supplementary Information

For

### Synthesis optimization of the ultra-microporous [Ni<sub>3</sub>(HCOO)<sub>6</sub>] framework to improve its CH<sub>4</sub>/N<sub>2</sub> separation selectivity

Xinyu Ren,<sup>a,b</sup> Tianjun Sun,<sup>\*a</sup> Jiangliang Hu,<sup>a,b</sup> and Shudong Wang<sup>\*a,c</sup>

<sup>a</sup> Dalian National Laboratory for Clean Energy, Dalian Institute of Chemical Physics, Chinese

Academy of Sciences, Dalian 116023, P. R. China.

<sup>b</sup> University of Chinese Academy of Sciences, Beijing 100049, P. R. China

<sup>c</sup> State Key Laboratory of Catalysis, Dalian Institute of Chemical Physics, Chinese Academy of

Sciences, Dalian 116023, China

Corresponding Authors

\* E-mail: wangsd@dicp.ac.cn (Shudong Wang); suntianjun@dicp.ac.cn (Tianjun Sun).

**Section S1 Schematic set-up for breakthrough experiments**

**Section S2 Thermal stability analysis**

**Section S3 Chemical stability analysis**

**Section S4 CH<sub>4</sub> and N<sub>2</sub> adsorption data**

**Section S5 Breakthrough separation experiments**

## Section S1 Schematic set-up for breakthrough experiments

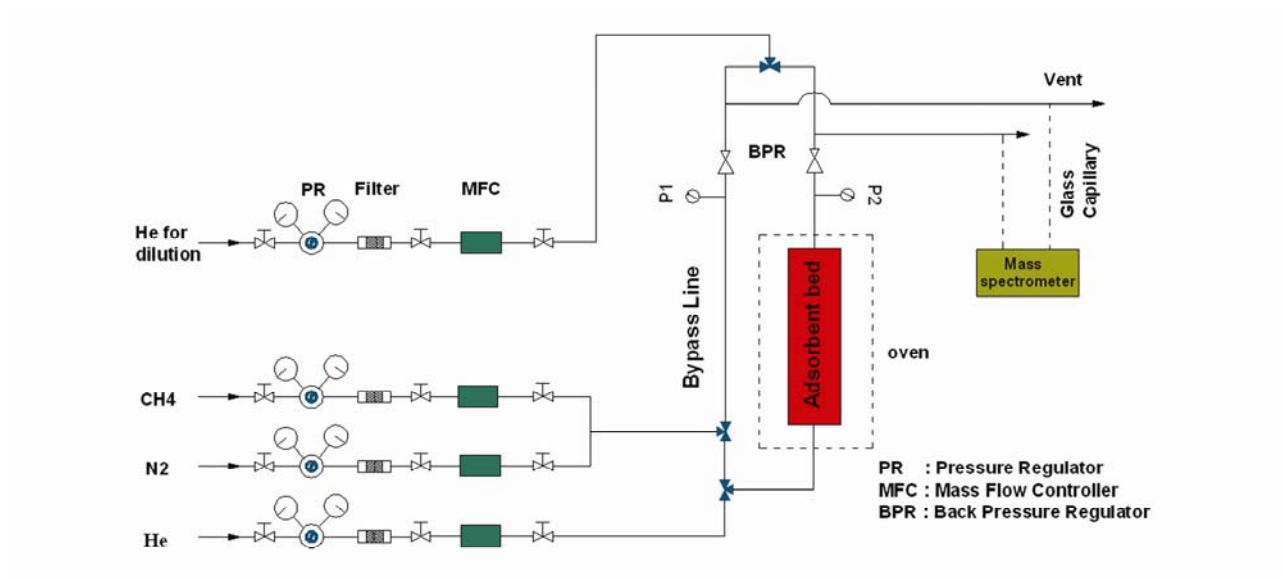

**Fig. S1** Apparatus used for collection of breakthrough curves.

## Section S2 Thermal stability analysis

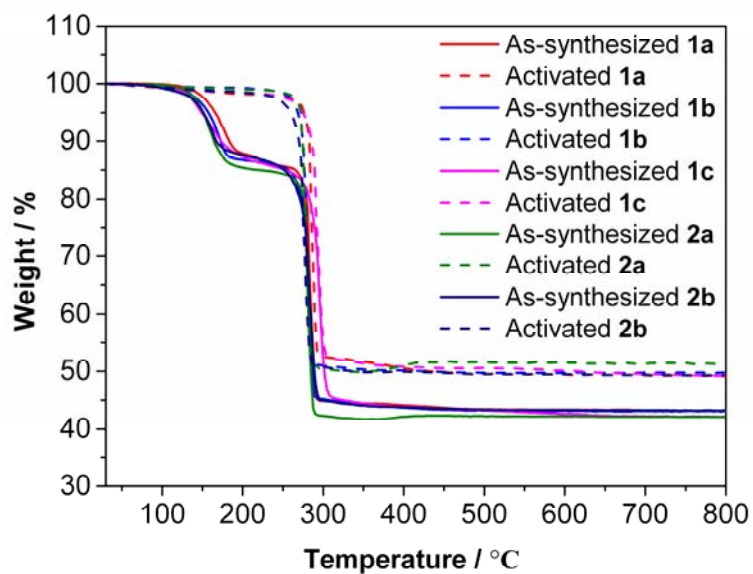

Fig. S2 TGA curves of  $[\text{Ni}_3(\text{HCOO})_6]$  samples in air atmosphere.

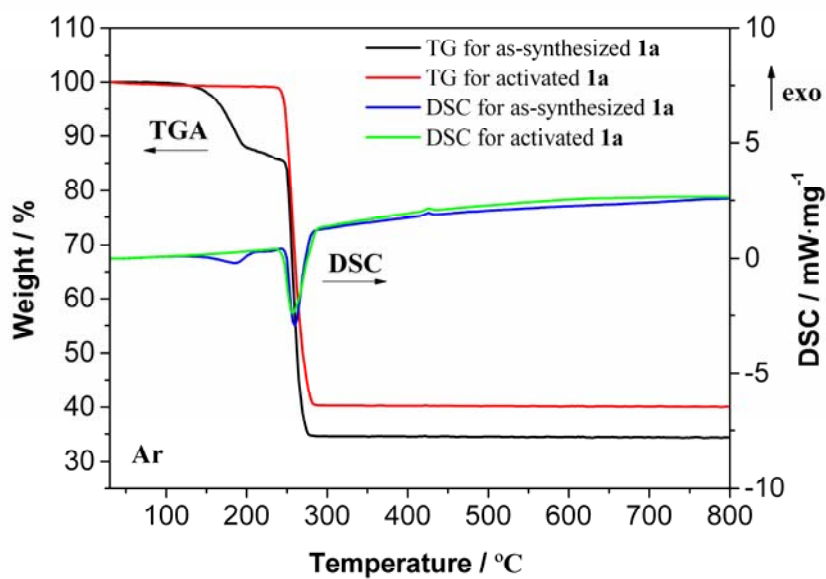

Fig. S3 TGA/DSC curves of Sample 1a in Ar atmosphere.

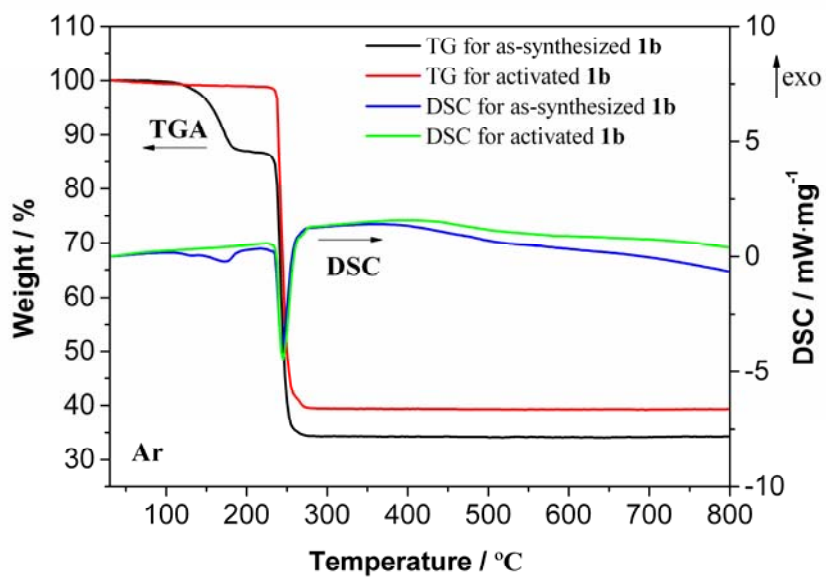

Fig. S4 TGA/DSC curves of Sample **1b** in Ar atmosphere.

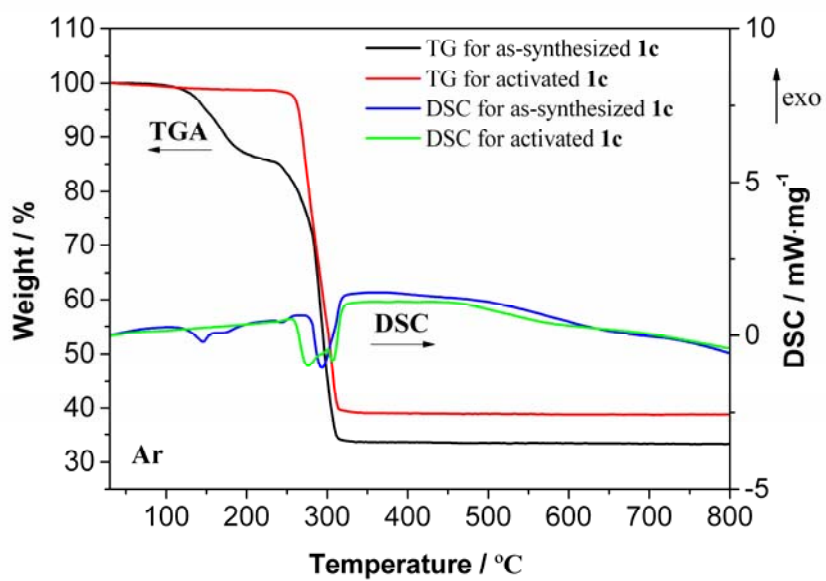

Fig. S5 TGA/DSC curves of Sample **1c** in Ar atmosphere.

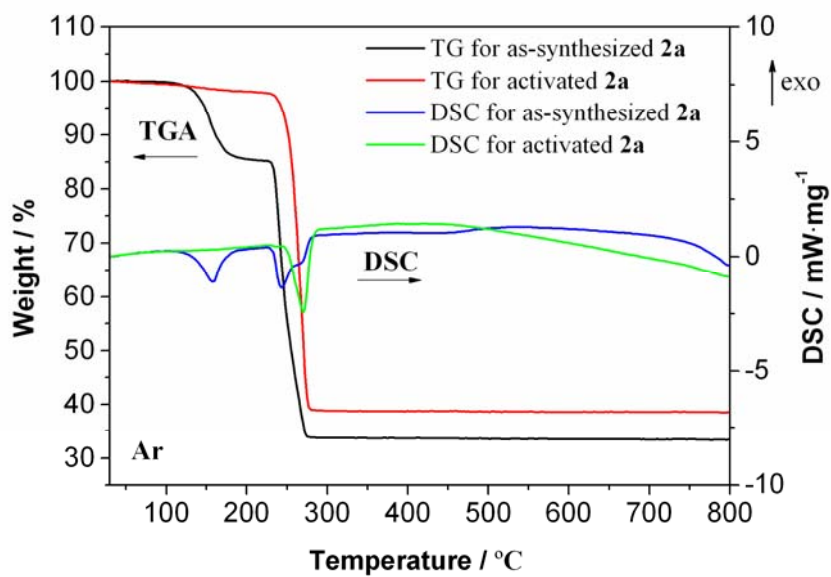

**Fig. S6** TGA/DSC curves of Sample **2a** in Ar atmosphere.

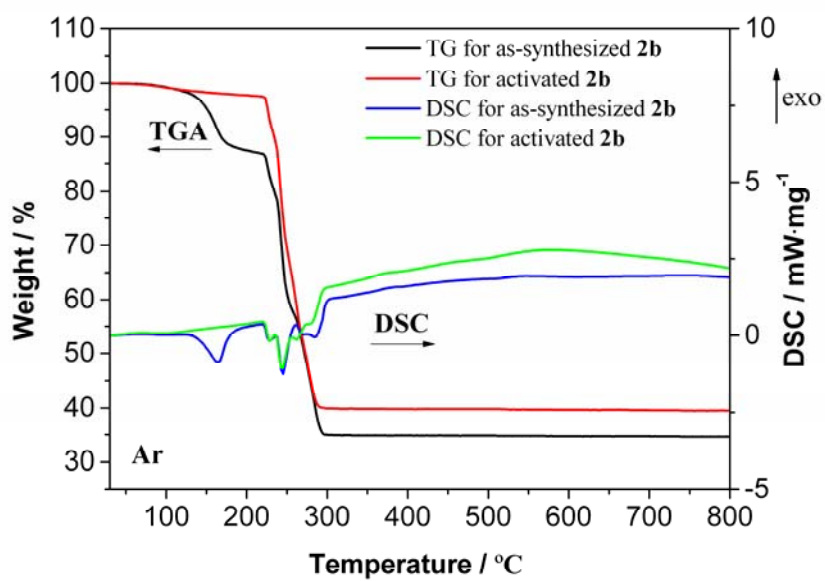

**Fig. S7** TGA/DSC curves of Sample **2b** in Ar atmosphere.

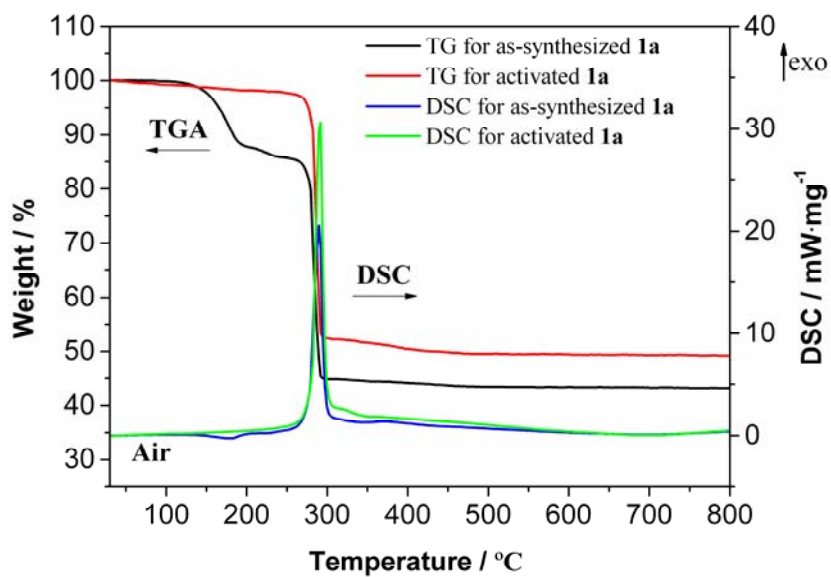

**Fig. S8** TGA/DSC curves of Sample **1a** in air atmosphere.

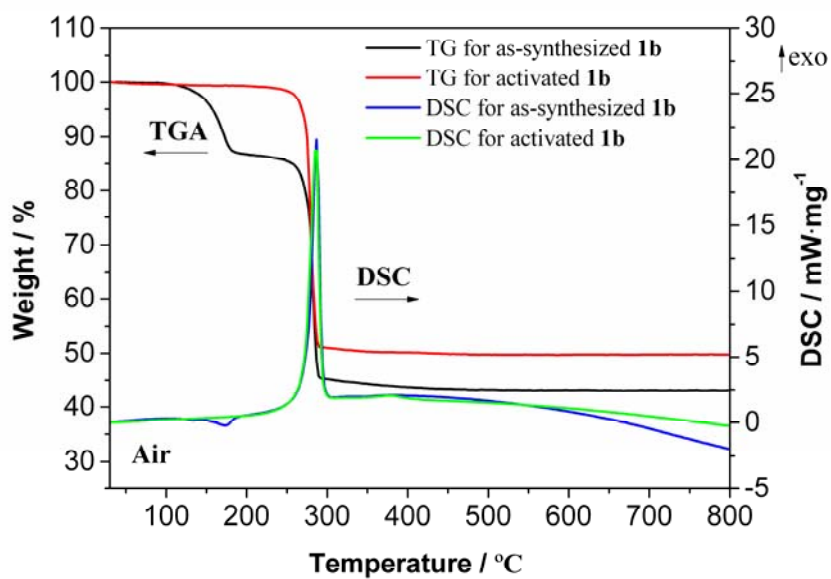

**Fig. S9** TGA/DSC curves of Sample **1b** in air atmosphere.

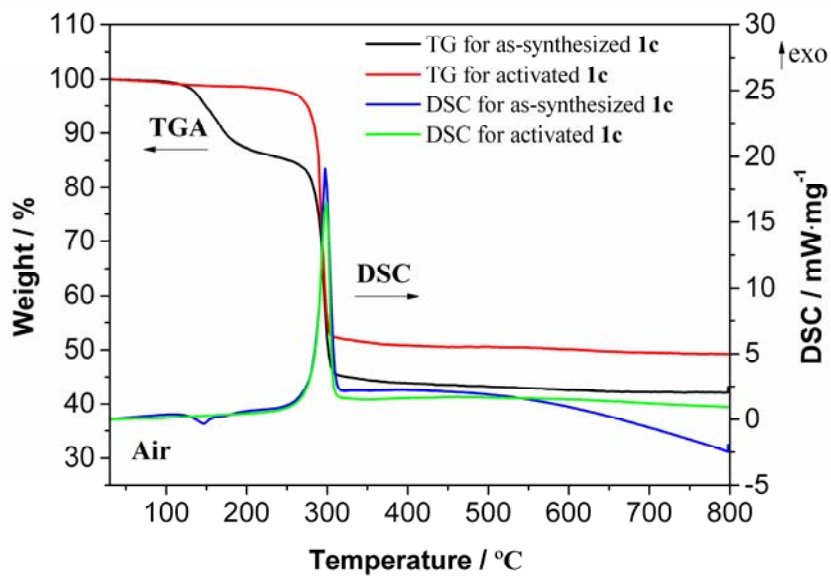

**Fig. S10** TGA/DSC curves of Sample **1c** in air atmosphere.

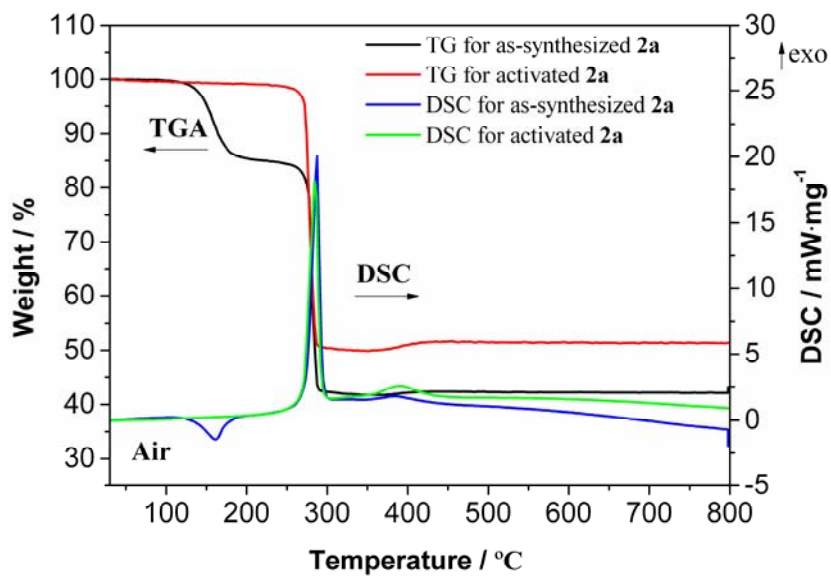

**Fig. S11** TGA/DSC curves of Sample **2a** in air atmosphere.

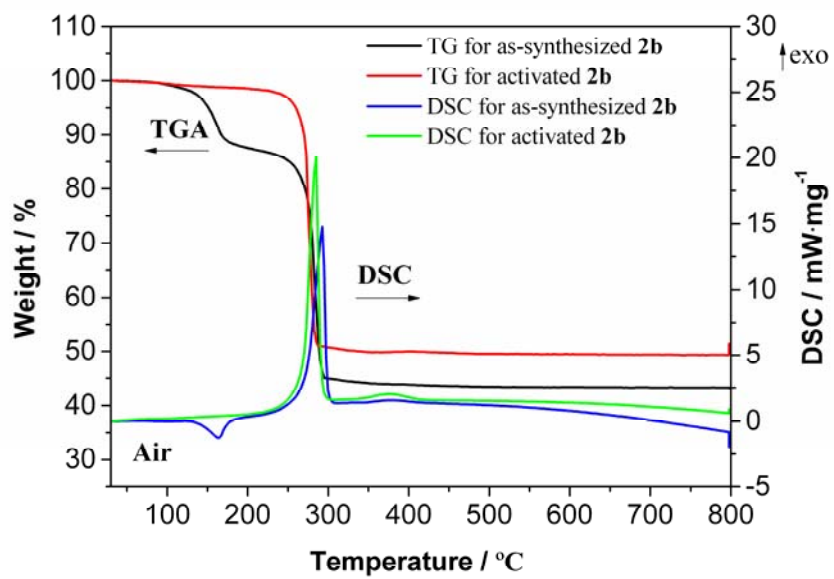

**Fig. S12** TGA/DSC curves of Sample **2b** in air atmosphere.



## Section S3 Chemical stability analysis

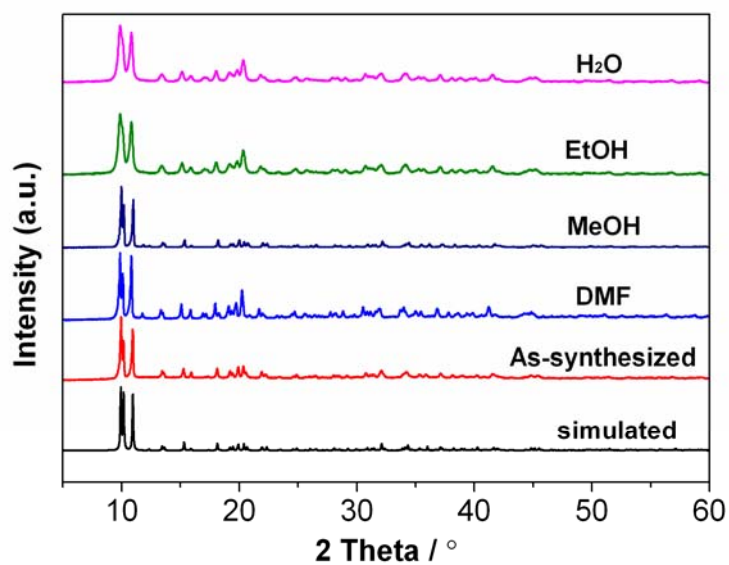

**Fig. S13** PXRD patterns of  $[\text{Ni}_3(\text{HCOO})_6]$  samples collected for stability test in DMF, Methanol, Ethanol and water at 100 °C for 24 hours.

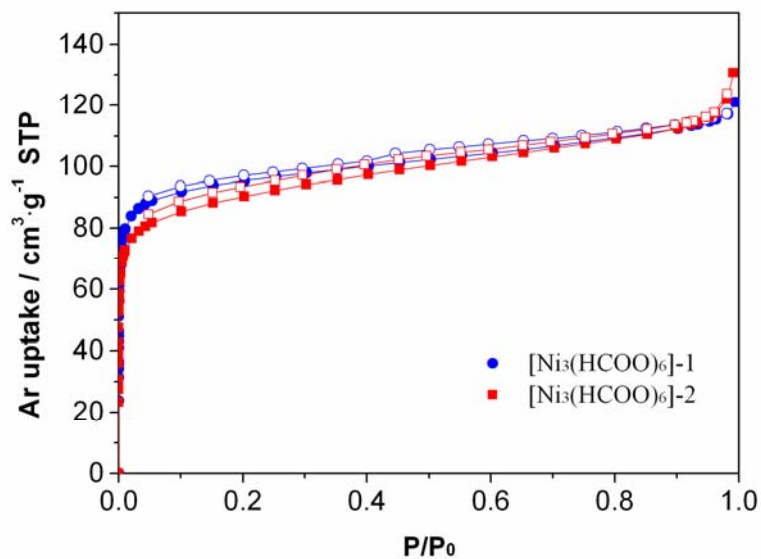

**Fig. S14** Ar adsorption isotherms of  $[\text{Ni}_3(\text{HCOO})_6]$ -1 and  $[\text{Ni}_3(\text{HCOO})_6]$ -2 after water treatment.

## Section S4 CH<sub>4</sub> and N<sub>2</sub> adsorption data

**Table S1**

Parameters from low pressure gas adsorption isotherm modelling by Toth model for CH<sub>4</sub> and N<sub>2</sub> adsorption on Sample **1a** at different temperatures and the ideal selectivities at zero coverage calculated from Henry's law constants

| Pure gas isotherm model                                               | Parameter/Unit                                            | 288 K     | 298 K                 | 308 K                |
|-----------------------------------------------------------------------|-----------------------------------------------------------|-----------|-----------------------|----------------------|
|                                                                       |                                                           |           | <b>CH<sub>4</sub></b> |                      |
| Toth<br>$N = N_{\max} \times B \times P / (1 + (B \times P)^c)^{1/c}$ | $N_{\max}/\text{mmol} \cdot \text{g}^{-1}$                | 2.196     | 2.056                 | 1.979                |
|                                                                       | $B/\text{torr}^{-1}$                                      | 8.835E-04 | 6.992E-04             | 5.247E-04            |
|                                                                       | $c$                                                       | 1.119     | 1.134                 | 1.154                |
|                                                                       | $K_H/\text{mmol} \cdot (\text{g} \cdot \text{torr})^{-1}$ | 1.940E-03 | 1.437E-03             | 1.039E-03            |
|                                                                       | $R^2$                                                     | 0.99999   | 0.99999               | 0.99999              |
|                                                                       | $D_n/\%$                                                  | 0.001     | 0.339                 | 0.173                |
|                                                                       |                                                           |           |                       | <b>N<sub>2</sub></b> |
|                                                                       | $N_{\max}/\text{mmol} \cdot \text{g}^{-1}$                | 1.829     | 1.561                 | 1.481                |
|                                                                       | $B/\text{torr}^{-1}$                                      | 1.758E-04 | 1.514E-04             | 1.239E-04            |
|                                                                       | $c$                                                       | 1.106     | 1.156                 | 1.143                |
|                                                                       | $K_H/\text{mmol} \cdot (\text{g} \cdot \text{torr})^{-1}$ | 3.215E-04 | 2.363E-04             | 1.835E-04            |
|                                                                       | $R^2$                                                     | 1.00000   | 1.00000               | 0.99999              |
|                                                                       | $D_n/\%$                                                  | 0.354     | 0.520                 | 0.812                |
| Ideal selectivity                                                     |                                                           |           |                       |                      |
| $S_{\text{CH}_4/\text{N}_2} = K_{\text{H,CH}_4} / K_{\text{H,N}_2}$   |                                                           | 6.0       | 6.1                   | 5.7                  |

**Table S2**

Parameters from low pressure gas adsorption isotherm modelling by Toth model for CH<sub>4</sub> and N<sub>2</sub> adsorption on Sample **1b** at different temperatures and the ideal selectivities at zero coverage calculated from Henry's law constants

| Pure gas isotherm model                                       | Parameter/Unit                                                      | 288 K     | 298 K                 | 308 K     |
|---------------------------------------------------------------|---------------------------------------------------------------------|-----------|-----------------------|-----------|
| Toth                                                          |                                                                     |           | <b>CH<sub>4</sub></b> |           |
| $N = N_{\max} \times B \times P / (1 + (B \times P)^c)^{1/c}$ | $N_{\max}/\text{mmol} \cdot \text{g}^{-1}$                          | 2.095     | 2.091                 | 2.075     |
|                                                               | $B/\text{torr}^{-1}$                                                | 9.611E-04 | 6.822E-04             | 5.052E-04 |
|                                                               | $c$                                                                 | 1.160     | 1.173                 | 1.155     |
|                                                               | $K_H/\text{mmol} \cdot (\text{g} \cdot \text{torr})^{-1}$           | 2.013E-03 | 1.427E-03             | 1.048E-03 |
|                                                               | $R^2$                                                               | 1.00000   | 1.00000               | 1.00000   |
|                                                               | $D_n/\%$                                                            | 0.192     | 0.870                 | 0.435     |
|                                                               |                                                                     |           | <b>N<sub>2</sub></b>  |           |
|                                                               | $N_{\max}/\text{mmol} \cdot \text{g}^{-1}$                          | 1.629     | 1.220                 | 0.832     |
|                                                               | $B/\text{torr}^{-1}$                                                | 2.026E-04 | 2.030E-04             | 2.227E-04 |
|                                                               | $c$                                                                 | 1.184     | 1.303                 | 1.505     |
|                                                               | $K_H/\text{mmol} \cdot (\text{g} \cdot \text{torr})^{-1}$           | 3.302E-04 | 2.476E-04             | 1.853E-04 |
|                                                               | $R^2$                                                               | 1.00000   | 1.00000               | 1.00000   |
|                                                               | $D_n/\%$                                                            | 0.562     | 0.988                 | 1.480     |
| Ideal selectivity                                             |                                                                     |           |                       |           |
|                                                               | $S_{\text{CH}_4/\text{N}_2} = K_{\text{H,CH}_4} / K_{\text{H,N}_2}$ | 6.1       | 5.8                   | 5.7       |

**Table S3**

Parameters from low pressure gas adsorption isotherm modelling by Toth model for CH<sub>4</sub> and N<sub>2</sub> adsorption on Sample **1c** at different temperatures and the ideal selectivities at zero coverage calculated from Henry's law constants

| Pure gas isotherm model                                       | Parameter/Unit                                                      | 288 K     | 298 K                 | 308 K     |
|---------------------------------------------------------------|---------------------------------------------------------------------|-----------|-----------------------|-----------|
| Toth                                                          |                                                                     |           | <b>CH<sub>4</sub></b> |           |
| $N = N_{\max} \times B \times P / (1 + (B \times P)^c)^{1/c}$ | $N_{\max}/\text{mmol} \cdot \text{g}^{-1}$                          | 1.880     | 1.858                 | 1.852     |
|                                                               | $B/\text{torr}^{-1}$                                                | 9.527E-04 | 7.018E-04             | 5.086E-04 |
|                                                               | $c$                                                                 | 1.142     | 1.158                 | 1.133     |
|                                                               | $K_H/\text{mmol} \cdot (\text{g} \cdot \text{torr})^{-1}$           | 1.791E-03 | 1.304E-03             | 9.417E-04 |
|                                                               | $R^2$                                                               | 1.00000   | 1.00000               | 1.00000   |
|                                                               | $D_n/\%$                                                            | 0.538     | 0.344                 | 0.558     |
|                                                               |                                                                     |           | <b>N<sub>2</sub></b>  |           |
|                                                               | $N_{\max}/\text{mmol} \cdot \text{g}^{-1}$                          | 1.735     | 1.116                 | 0.790     |
|                                                               | $B/\text{torr}^{-1}$                                                | 1.702E-04 | 1.963E-04             | 2.050E-04 |
|                                                               | $c$                                                                 | 1.106     | 1.291                 | 1.458     |
|                                                               | $K_H/\text{mmol} \cdot (\text{g} \cdot \text{torr})^{-1}$           | 2.953E-04 | 2.190E-04             | 1.621E-04 |
|                                                               | $R^2$                                                               | 1.00000   | 1.00000               | 1.00000   |
|                                                               | $D_n/\%$                                                            | 0.716     | 1.110                 | 1.850     |
| Ideal selectivity                                             |                                                                     |           |                       |           |
|                                                               | $S_{\text{CH}_4/\text{N}_2} = K_{\text{H,CH}_4} / K_{\text{H,N}_2}$ | 6.1       | 6.0                   | 5.8       |

**Table S4**

Parameters from low pressure gas adsorption isotherm modelling by Toth model for CH<sub>4</sub> and N<sub>2</sub> adsorption on sample **2a** at different temperatures and the ideal selectivities at zero coverage calculated from Henry's law constants

| Pure gas isotherm model                                       | Parameter/Unit                                                      | 288 K     | 298 K                 | 308 K     |
|---------------------------------------------------------------|---------------------------------------------------------------------|-----------|-----------------------|-----------|
| Toth                                                          |                                                                     |           | <b>CH<sub>4</sub></b> |           |
| $N = N_{\max} \times B \times P / (1 + (B \times P)^c)^{1/c}$ | $N_{\max}/\text{mmol} \cdot \text{g}^{-1}$                          | 2.103     | 2.102                 | 2.101     |
|                                                               | $B/\text{torr}^{-1}$                                                | 9.78E-04  | 7.10E-04              | 5.03E-04  |
|                                                               | $c$                                                                 | 1.156     | 1.141                 | 1.125     |
|                                                               | $K_H/\text{mmol} \cdot (\text{g} \cdot \text{torr})^{-1}$           | 2.057E-03 | 1.492E-03             | 1.056E-03 |
|                                                               | $R^2$                                                               | 1.00000   | 1.00000               | 1.00000   |
|                                                               | $D_n/\%$                                                            | 0.180     | 0.266                 | 0.347     |
|                                                               |                                                                     |           | <b>N<sub>2</sub></b>  |           |
|                                                               | $N_{\max}/\text{mmol} \cdot \text{g}^{-1}$                          | 0.887     | 0.393                 | 0.349     |
|                                                               | $B/\text{torr}^{-1}$                                                | 3.541E-04 | 5.865E-04             | 4.884E-04 |
|                                                               | $c$                                                                 | 1.729     | 2.838                 | 2.968     |
|                                                               | $K_H/\text{mmol} \cdot (\text{g} \cdot \text{torr})^{-1}$           | 3.140E-04 | 2.302E-04             | 1.705E-04 |
|                                                               | $R^2$                                                               | 0.99999   | 0.99999               | 0.99998   |
|                                                               | $D_n/\%$                                                            | 3.912     | 4.762                 | 7.967     |
| Ideal selectivity                                             |                                                                     |           |                       |           |
|                                                               | $S_{\text{CH}_4/\text{N}_2} = K_{\text{H,CH}_4} / K_{\text{H,N}_2}$ | 6.6       | 6.5                   | 6.2       |

**Table S5**

Parameters from low pressure gas adsorption isotherm modelling by Toth model for CH<sub>4</sub> and N<sub>2</sub> adsorption on sample **2b** at different temperatures and the ideal selectivities at zero coverage calculated from Henry's law constants

| Pure gas isotherm model                                             | Parameter/Unit                                            | 288 K     | 298 K                 | 308 K                |
|---------------------------------------------------------------------|-----------------------------------------------------------|-----------|-----------------------|----------------------|
| Toth                                                                |                                                           |           | <b>CH<sub>4</sub></b> |                      |
| $N = N_{\max} \times B \times P / (1 + (B \times P)^c)^{1/c}$       | $N_{\max}/\text{mmol} \cdot \text{g}^{-1}$                | 1.187     | 1.149                 | 1.117                |
|                                                                     | $B/\text{torr}^{-1}$                                      | 8.869E-04 | 6.463E-04             | 4.807E-04            |
|                                                                     | $c$                                                       | 1.122     | 1.144                 | 1.128                |
|                                                                     | $K_H/\text{mmol} \cdot (\text{g} \cdot \text{torr})^{-1}$ | 1.053E-03 | 7.427E-04             | 5.369E-04            |
|                                                                     | $R^2$                                                     | 1.00000   | 1.00000               | 1.00000              |
|                                                                     | $D_n/\%$                                                  | 0.775     | 0.700                 | 0.592                |
|                                                                     |                                                           |           |                       | <b>N<sub>2</sub></b> |
|                                                                     | $N_{\max}/\text{mmol} \cdot \text{g}^{-1}$                | 0.912     | 0.546                 | 0.291                |
|                                                                     | $B/\text{torr}^{-1}$                                      | 2.389E-04 | 2.873E-04             | 3.851E-04            |
|                                                                     | $c$                                                       | 1.351     | 1.619                 | 2.148                |
|                                                                     | $K_H/\text{mmol} \cdot (\text{g} \cdot \text{torr})^{-1}$ | 2.180E-04 | 1.570E-04             | 1.119E-04            |
|                                                                     | $R^2$                                                     | 0.99999   | 0.99999               | 0.99998              |
|                                                                     | $D_n/\%$                                                  | 3.425     | 2.722                 | 5.047                |
|                                                                     |                                                           |           |                       |                      |
| Ideal selectivity                                                   |                                                           |           |                       |                      |
| $S_{\text{CH}_4/\text{N}_2} = K_{\text{H,CH}_4} / K_{\text{H,N}_2}$ |                                                           | 4.8       | 4.7                   | 4.8                  |

## Section S5 Breakthrough separation experiments

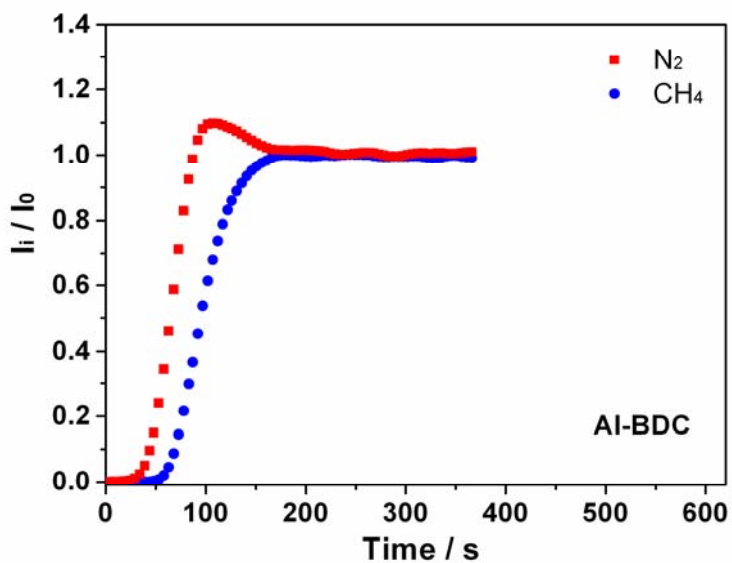

**Fig. S15** Breakthrough curves of the CH<sub>4</sub>-N<sub>2</sub> equimolar mixture at 298 K and 2.0 bar on Al-BDC.

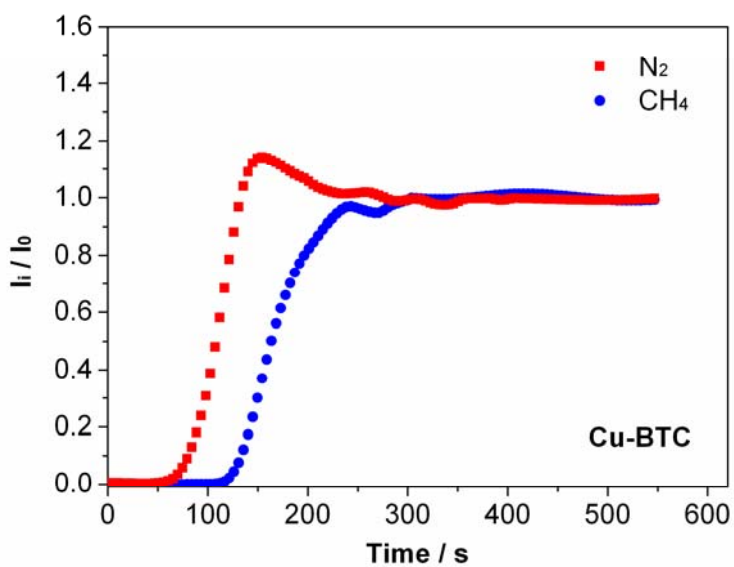

**Fig. S16** Breakthrough curves of the CH<sub>4</sub>-N<sub>2</sub> equimolar mixture at 298 K and 2.0 bar on Cu-BTC.

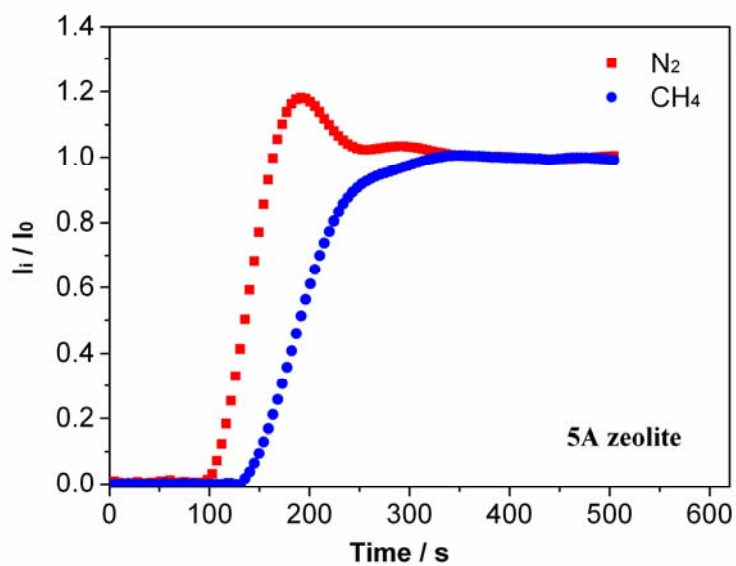

**Fig. S17** Breakthrough curves of the CH<sub>4</sub>-N<sub>2</sub> equimolar mixture at 298 K and 2.0 bar on 5A zeolite.

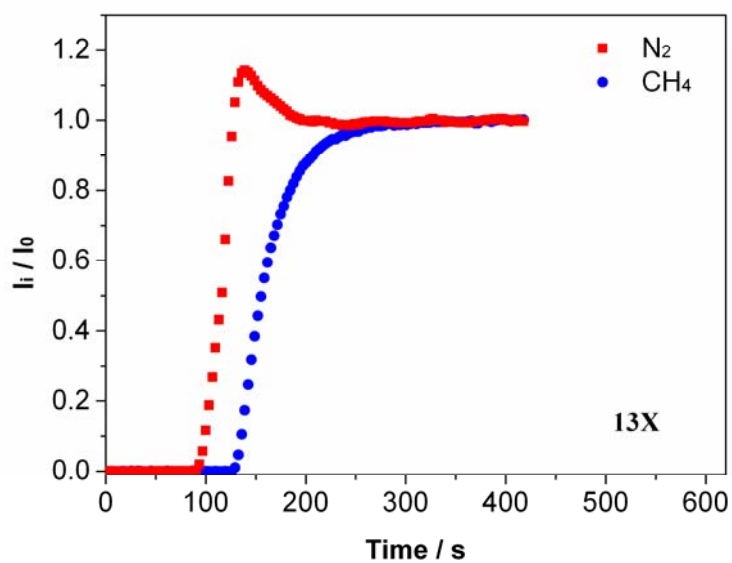

**Fig. S18** Breakthrough curves of the CH<sub>4</sub>-N<sub>2</sub> equimolar mixture at 298 K and 2.0 bar on 13X zeolite.



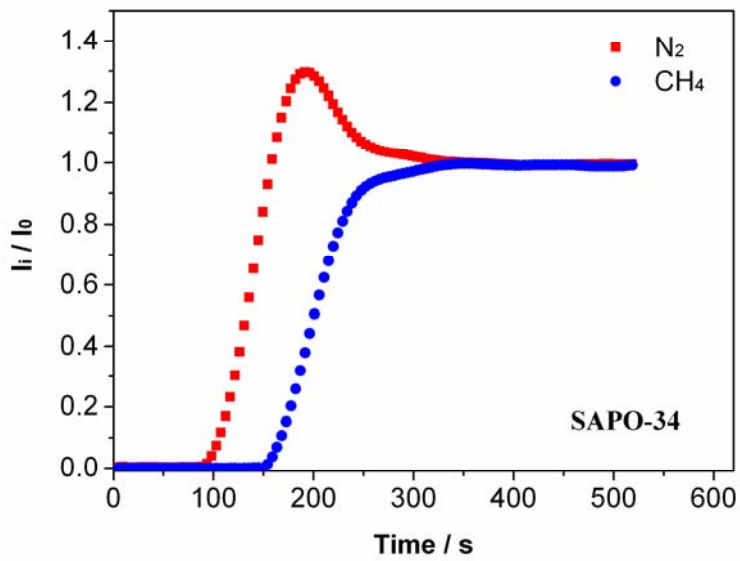

**Fig. S18** Breakthrough curves of the CH<sub>4</sub>-N<sub>2</sub> equimolar mixture at 298 K and 2.0 bar on SAPO-34.

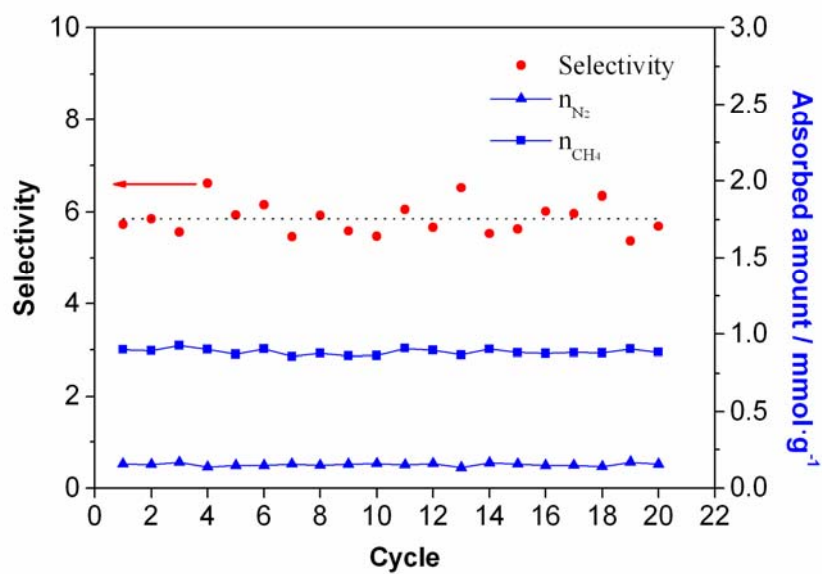

**Fig. S19** Stability of regeneration for Sample 1a.
